# Supplementary material for: Trio deep-sequencing does not reveal unexpected off-target and on-target mutations in Cas9-edited rhesus monkeys
Source: PubMed Central journal article supplement (PMC6892871; doi:10.1038/s41467-019-13481-y), 2019-12-04
Supplement: 41467_2019_13481_MOESM1_ESM.pdf [file 41467_2019_13481_MOESM1_ESM.pdf]

## **Supplementary figures and tables**

**Supplementary Fig. 1 | Generation of Cas9-mediated *MCPH1* gene knockout rhesus monkeys.**

**Supplementary Fig. 2 | Microscope image of Cas9-treated rhesus monkey embryos.**

**Supplementary Fig. 3 | Cas9-mediated *MCPH1* gene knockout in the cultured rhesus monkey embryos.**

**Supplementary Fig. 4 | Snapshot of the alignment of NGS reads within the target regions.**

**Supplementary Fig. 5 | The genetic relationship among the Cas9-treated monkeys.**

**Supplementary Fig. 6 | Genome-wide distribution of DNMs of the Cas9-edited monkeys.**

**Supplementary Fig. 7 | Venn diagram of the overlapping DNMs called using four different tools.**

**Supplementary Fig. 8 | Sanger validation results of rmO1<sup>ko</sup> DNMs.**

**Supplementary Table 1 | Sample information.**

**Supplementary Table 2 | Quality control of whole genome sequencing data.**

**Supplementary Table 3 | Statistics of variants intersection rate between different tools.**

**Supplementary Table 4 | Summary of mutations located in the predicted off-target regions detected by WGS data.**

**Supplementary Table 5 | Oligonucleotides for generating sgRNA expression vectors.**

**Supplementary Table 6 | Primers for genotyping.**

**Supplementary Table 7 | Commands used for variant calling.**

**Supplementary Table 8 | Commands used for SNP filtering.**

**Supplementary Table 9 | Commands used for INDEL filtering.**

**Supplementary Table 10 | Commands for universal mask (UM)**

**Supplementary Fig. 1 | Generation of Cas9-mediated *MCPH1* gene knockout rhesus monkeys.**

**a**, The schematic overview of sgRNA design targeting rhesus monkey *MCPH1* gene; **b**, photograph of two Cas9-edited rhesus monkeys (rmO3<sup>ko</sup> and rmO4<sup>ko\*</sup>). **c**, *MCPH1* sequences carrying indels within the target regions of Cas9-edited rhesus monkeys. The PAM sequences are underlined and highlighted in red and the targeted sequences are in blue. The deletion sizes and ratios are indicated in parentheses.

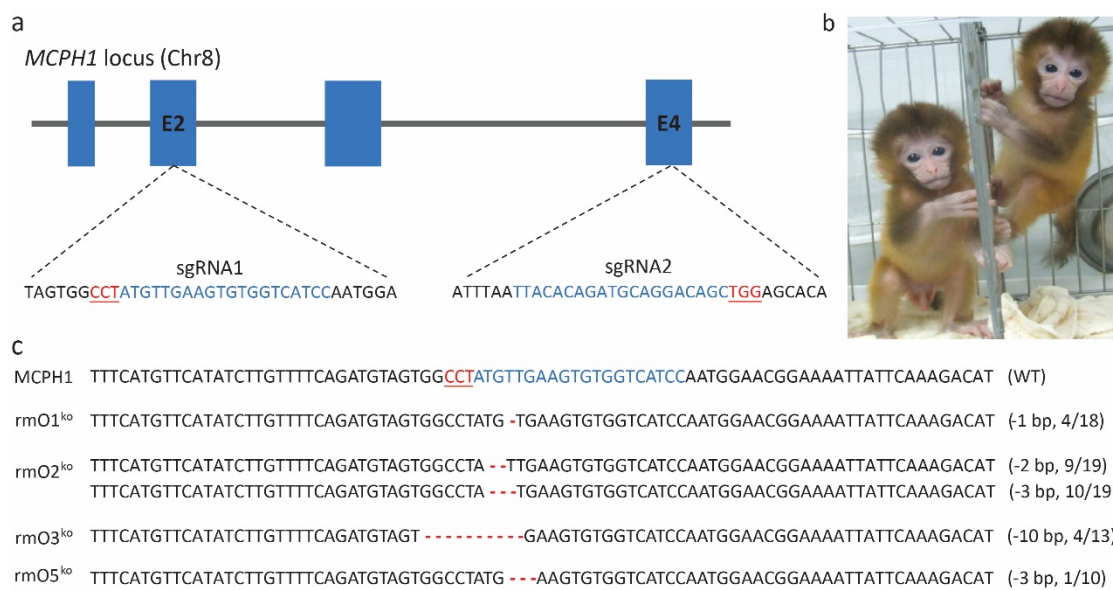

**Supplementary Fig. 2 | Microscope image of Cas9-treated rhesus monkey embryos.**

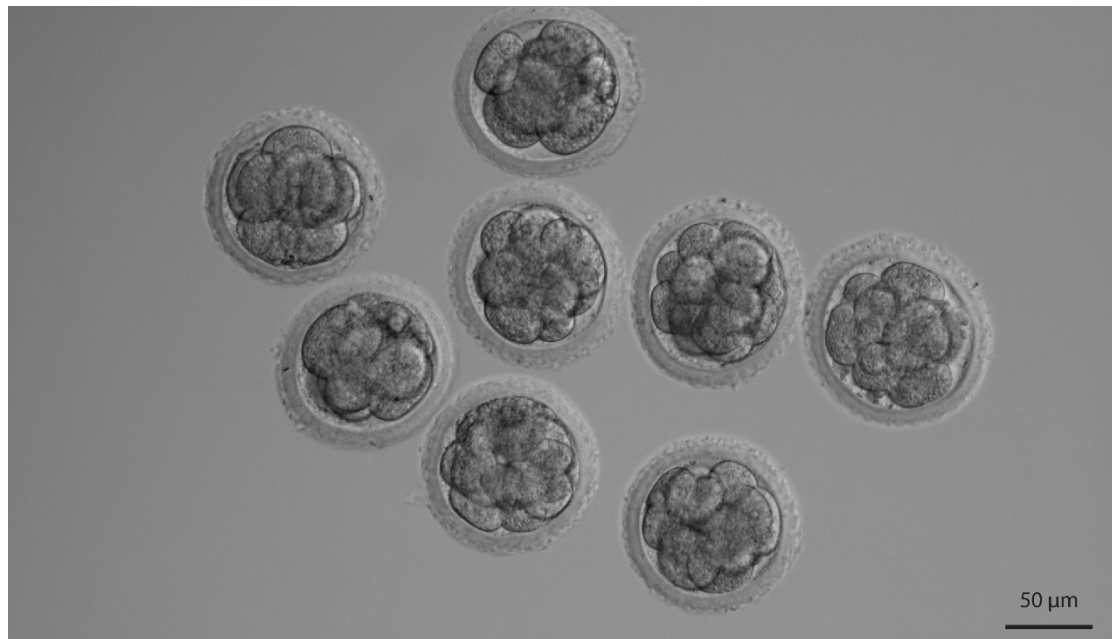



**Supplementary Fig. 4 | Snapshot of the alignment of NGS reads within the target regions. The gray-highlighted region refers to sgRNA and “\*” refers to deletion.**

rmO2-B<sup>ko</sup> sgRNA1

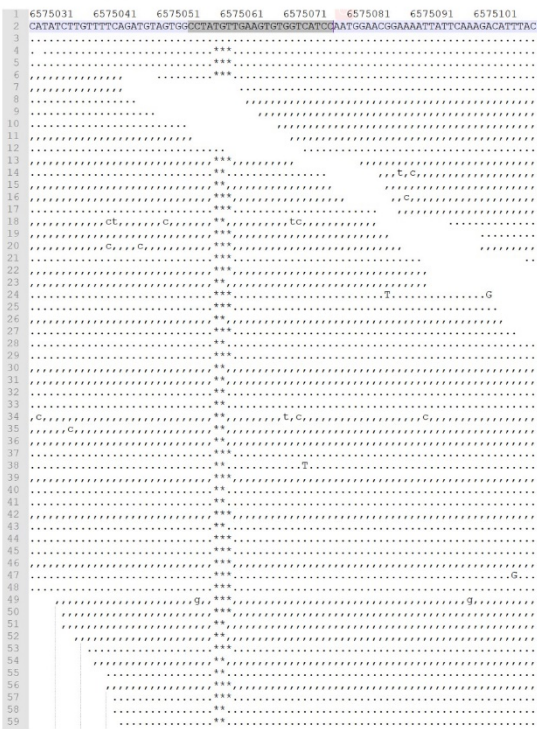

rmO2-B<sup>ko</sup> sgRNA2

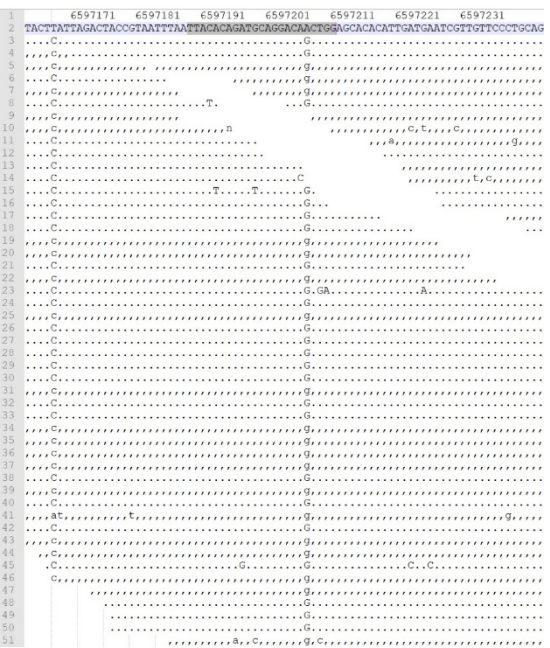

rmO2-L<sup>ko</sup> sgRNA1

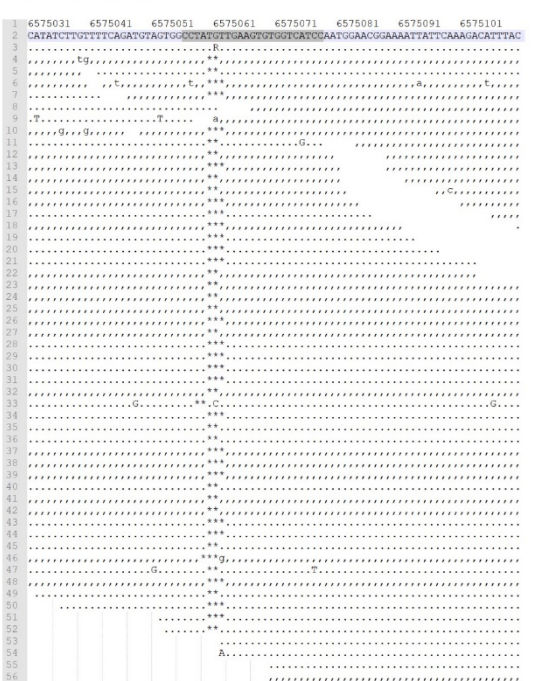

rmO2-L<sup>ko</sup> sgRNA2

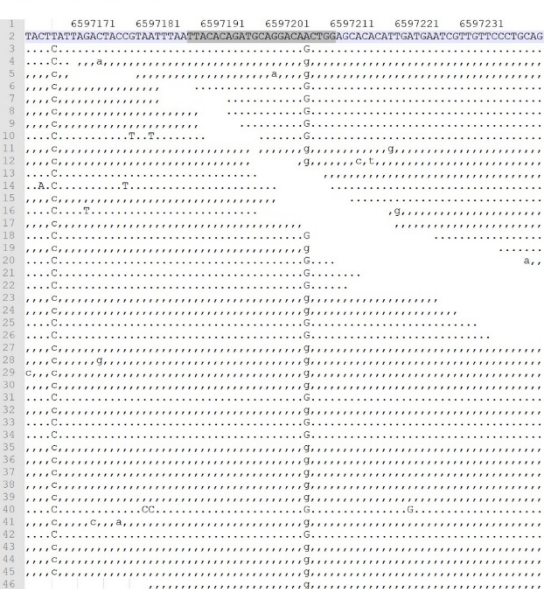

rmO2-M<sup>ko</sup> sgRNA1

```
1 6575031 6575041 6575051 6575061 6575071 6575081 6575091 6575101
2 CATATCTGTGTTTCAGATGAGTGGCCATATGAGAGTGGTCAACGATGGAAAGGAAATATTCAAGACATTAC
3 .....
4 .....
5 .....
6 .....
7 .....
8 .....
9 .....
10 AC.....A.....G.....
11 .....
12 .....
13 .....
14 .....
15 .....
16 .....
17 .....
18 .....
19 .....
20 .....
21 .....
22 .....
23 .....
24 .....
25 .....
26 .....
27 .....
28 .....
29 .....
30 .....
31 .....
32 .....
33 .....
34 .....
35 .....
36 .....
37 .....
38 .....
39 .....
40 .....
41 .....
42 .....
43 .....
44 .....
45 .....
46 .....
47 .....
48 .....
49 .....
```

rmO2-M<sup>ko</sup> sgRNA2

```
1 6597171 6597181 6597191 6597201 6597211 6597221 6597231
2 TACTTATTAGACTACCGTATTATACACAGATCGGGAACCTGGAGCACACATTGATGAATCGTGTCCCTCGAG
3 .....
4 .....
5 .....
6 .....
7 .....
8 .....
9 .....
10 .....
11 .....
12 .....
13 .....
14 .....
15 .....
16 .....
17 .....
18 .....
19 .....
20 .....
21 .....
22 .....
23 .....
24 .....
25 .....
26 .....
27 .....
28 .....
29 .....
30 .....
31 .....
32 .....
33 .....
34 .....
35 .....
36 .....
37 .....
38 .....
39 .....
40 .....
41 .....
42 .....
43 .....
44 .....
45 .....
46 .....
47 .....
48 .....
```

rmO1<sup>ko</sup> sgRNA1

```
1 6575031 6575041 6575051 6575061 6575071 6575081 6575091 6575101
2 CATATCTGTGTTTCAGATGAGTGGCCATATGAGAGTGGTCAACGATGGAAAGGAAATATTCAAGACATTAC
3 .....
4 .....
5 .....
6 .....
7 .....
8 .....
9 .....
10 .....
11 .....
12 .....
13 .....
14 .....
15 .....
16 .....
17 .....
18 .....
19 .....
20 .....
21 .....
22 .....
23 .....
24 .....
25 .....
26 .....
27 .....
28 .....
29 .....
30 .....
31 .....
32 .....
33 .....
34 .....
35 .....
36 .....
37 .....
38 .....
39 .....
40 .....
41 .....
42 .....
43 .....
44 .....
45 .....
46 .....
47 .....
48 .....
49 .....
```

rmO1<sup>ko</sup> sgRNA2

```
1 6597171 6597181 6597191 6597201 6597211 6597221 6597231
2 TACTTATTAGACTACCGTATTATACACAGATCGGGAACCTGGAGCACACATTGATGAATCGTGTCCCTCGAG
3 .....
4 .....
5 .....
6 .....
7 .....
8 .....
9 .....
10 .....
11 .....
12 .....
13 .....
14 .....
15 .....
16 .....
17 .....
18 .....
19 .....
20 .....
21 .....
22 .....
23 .....
24 .....
25 .....
26 .....
27 .....
28 .....
29 .....
30 .....
31 .....
32 .....
33 .....
34 .....
35 .....
36 .....
37 .....
38 .....
39 .....
40 .....
41 .....
42 .....
43 .....
44 .....
45 .....
46 .....
47 .....
48 .....
49 .....
50 .....
51 .....
52 .....
53 .....
54 .....
55 .....
56 .....
57 .....
58 .....
```

rmO3<sup>ko</sup> sgRNA1

```
1 6575031 6575041 6575051 6575061 6575071 6575081 6575091 6575101
2 CATATCTGTGTTTCAGATGTAGTGGCCATGTTGAAGTGTGSTCACCAGTGGAAAGCGAAATTTATCAAGACATTTAC
3 .....G.....
4 .....G.....
5 .....G.....
6 .....G.....
7 .....G.....
8 .....G.....
9 .....C..A.G.....
10 .....A.....T.....
11 .....
12 .....
13 .....
14 .....
15 .....
16 .....
17 .....
18 .....
19 .....
20 .....
21 .....
22 .....
23 .....
24 .....
25 .....
26 .....
27 .....
28 .....
29 .....
30 .....
31 .....
32 .....
33 .....
34 .....
35 .....
36 .....
37 .....C.....A.....
38 .....
39 .....
40 .....
41 .....
42 .....
43 .....
44 .....
45 .....
46 .....
47 .....
48 .....
```

rmO4<sup>ko\*</sup> sgRNA1

```
1 6575031 6575041 6575051 6575061 6575071 6575081 6575091 6575101
2 CATATCTGTGTTTCAGATGTAGTGGCCATGTTGAAGTGTGSTCACCAGTGGAAAGCGAAATTTATCAAGACATTTAC
3 .....G.....
4 .....G.....
5 .....G.....
6 .....G.....
7 .....G.....
8 .....G.....
9 .....G.....
10 .....G.....
11 .....G.....
12 .....G.....
13 .....G.....
14 .....G.....
15 .....G.....
16 .....G.....
17 .....G.....
18 .....G.....
19 .....G.....
20 .....G.....
21 .....G.....
22 .....G.....
23 .....G.....
24 .....G.....
25 .....G.....
26 .....G.....
27 .....G.....
28 .....G.....
29 .....G.....
30 .....G.....
31 .....G.....
32 .....G.....
33 .....G.....
34 .....G.....
35 .....G.....
36 .....G.....
37 .....G.....
38 .....G.....
39 .....G.....
40 .....G.....
41 .....G.....
42 .....G.....
43 .....G.....
44 .....G.....
```

rmO3<sup>ko</sup> sgRNA2

```
1 6597171 6597181 6597191 6597201 6597211 6597221 6597231
2 TACTTATTAGACTACCGTAATTTAATACAGATGCAGGCACATGGAGACACATTGATGATCGTGTCCCTCGAG
3 .....G.....
4 .....G.....
5 .....G.....
6 .....G.....
7 .....G.....
8 .....G.....
9 .....G.....
10 .....G.....
11 .....G.....
12 .....G.....
13 .....G.....
14 .....G.....
15 .....G.....
16 .....G.....
17 .....G.....
18 .....G.....
19 .....G.....
20 .....G.....
21 .....G.....
22 .....G.....
23 .....G.....
24 .....G.....
25 .....G.....
26 .....G.....
27 .....G.....
28 .....G.....
29 .....G.....
30 .....G.....
31 .....G.....
32 .....G.....
33 .....G.....
34 .....G.....
35 .....G.....
36 .....G.....
37 .....G.....
38 .....G.....
39 .....G.....
40 .....G.....
41 .....G.....
42 .....G.....
43 .....G.....
44 .....G.....
45 .....G.....
```

rmO4<sup>ko\*</sup> sgRNA2

```
1 6597171 6597181 6597191 6597201 6597211 6597221 6597231
2 TACTTATTAGACTACCGTAATTTAATACAGATGCAGGCACATGGAGACACATTGATGATCGTGTCCCTCGAG
3 .....G.....
4 .....G.....
5 .....G.....
6 .....G.....
7 .....G.....
8 .....G.....
9 .....G.....
10 .....G.....
11 .....G.....
12 .....G.....
13 .....G.....
14 .....G.....
15 .....G.....
16 .....G.....
17 .....G.....
18 .....G.....
19 .....G.....
20 .....G.....
21 .....G.....
22 .....G.....
23 .....G.....
24 .....G.....
25 .....G.....
26 .....G.....
27 .....G.....
28 .....G.....
29 .....G.....
30 .....G.....
31 .....G.....
32 .....G.....
33 .....G.....
34 .....G.....
35 .....G.....
36 .....G.....
37 .....G.....
38 .....G.....
39 .....G.....
40 .....G.....
41 .....G.....
42 .....G.....
43 .....G.....
44 .....G.....
45 .....G.....
46 .....G.....
```

rmO5<sup>ko</sup> sgRNA1

```
1 6575031 6575041 6575051 6575061 6575071 6575081 6575091 6575101
2 CATATCTGTGTTTCAGATGTAGGGCCATATGTTGAGTGTGGTCCATCGAATGGAAAGGAAATTAATCAAGACATTAC
3 .....G.....
4 .....G.....
5 .....G.....
6 .....G.....
7 .....G.....
8 .....G.....
9 .....G.....
10 .....G.....
11 .....G.....
12 .....G.....
13 .....G.....
14 .....G.....
15 .....G.....
16 .....G.....
17 .....G.....
18 .....G.....
19 .....G.....
20 .....G.....
21 .....G.....
22 .....G.....
23 .....G.....
24 .....G.....
25 .....G.....
26 .....G.....
27 .....G.....
28 .....G.....
29 .....G.....
30 .....G.....
31 .....G.....
32 .....G.....
33 .....G.....
34 .....G.....
35 .....G.....
36 .....G.....
37 .....G.....
38 .....G.....
39 .....G.....
```

rmO5<sup>ko</sup> sgRNA2

```
1 6597171 6597181 6597191 6597201 6597211 6597221 6597231
2 TACTTATTGACTACCGTAATTAAATACAGATCCAGGACACATGAGGACACATTGATGATGTTGTCCTCGCAG
3 .....G.....
4 .....G.....
5 .....G.....
6 .....G.....
7 .....G.....
8 .....G.....
9 .....G.....
10 .....G.....
11 .....G.....
12 .....G.....
13 .....G.....
14 .....G.....
15 .....G.....
16 .....G.....
17 .....G.....
18 .....G.....
19 .....G.....
20 .....G.....
21 .....G.....
22 .....G.....
23 .....G.....
24 .....G.....
25 .....G.....
26 .....G.....
27 .....G.....
28 .....G.....
29 .....G.....
30 .....G.....
31 .....G.....
32 .....G.....
33 .....G.....
34 .....G.....
35 .....G.....
36 .....G.....
37 .....G.....
38 .....G.....
39 .....G.....
40 .....G.....
41 .....G.....
42 .....G.....
43 .....G.....
44 .....G.....
45 .....G.....
46 .....G.....
47 .....G.....
48 .....G.....
49 .....G.....
50 .....G.....
51 .....G.....
52 .....G.....
53 .....G.....
```



**Supplementary Fig. 5 | The genetic relationship among the Cas9-treated monkeys.** Each cell indicated an IBD score calculated by individual pair. The darker a cell is, the higher is the IBD score and a closer relationship.

Rhesus monkey family-1

|                      | rmF <sup>wt</sup> | rmM1 <sup>wt</sup> | rmO1 <sup>ko</sup> | rmO2-B <sup>ko</sup> | rmO2-M <sup>ko</sup> | rmO2-L <sup>ko</sup> |
|----------------------|-------------------|--------------------|--------------------|----------------------|----------------------|----------------------|
| rmF <sup>wt</sup>    | 1                 |                    |                    |                      |                      |                      |
| rmM1 <sup>wt</sup>   | 0                 | 1                  |                    |                      |                      |                      |
| rmO1 <sup>ko</sup>   | 0.5               | 0.5                | 1                  |                      |                      |                      |
| rmO2-B <sup>ko</sup> | 0.4704            | 0.5                | 0.423              | 1                    |                      |                      |
| rmO2-M <sup>ko</sup> | 0.4705            | 0.5                | 0.4224             | 0.9248               | 1                    |                      |
| rmO2-L <sup>ko</sup> | 0.4705            | 0.5                | 0.4224             | 0.9245               | 0.9245               | 1                    |

Rhesus monkey family-2

|                     | rmF <sup>wt</sup> | rmM2 <sup>wt</sup> | rmO3 <sup>ko</sup> | rmO4 <sup>wt*</sup> | rmO5 <sup>ko</sup> |
|---------------------|-------------------|--------------------|--------------------|---------------------|--------------------|
| rmF <sup>wt</sup>   | 1                 |                    |                    |                     |                    |
| rmM2 <sup>wt</sup>  | 0                 | 1                  |                    |                     |                    |
| rmO3 <sup>ko</sup>  | 0.5               | 0.5                | 1                  |                     |                    |
| rmO4 <sup>wt*</sup> | 0.5               | 0.5                | 0.4607             | 1                   |                    |
| rmO5 <sup>ko</sup>  | 0.5               | 0.5                | 0.4827             | 0.473               | 1                  |

Cynomolgus monkey family

|                   | cmF <sup>wt</sup> | cmM <sup>wt</sup> | cmO <sup>ki</sup> |
|-------------------|-------------------|-------------------|-------------------|
| cmF <sup>wt</sup> | 1                 |                   |                   |
| cmM <sup>wt</sup> | 0                 | 1                 |                   |
| cmO <sup>ki</sup> | 0.5               | 0.5               | 1                 |

**Supplementary Fig. 6 | Genome-wide distribution of DNMs of the Cas9-edited monkeys.** The blue and red triangles indicate the locations of the SNPs and INDELS respectively in the genomes.

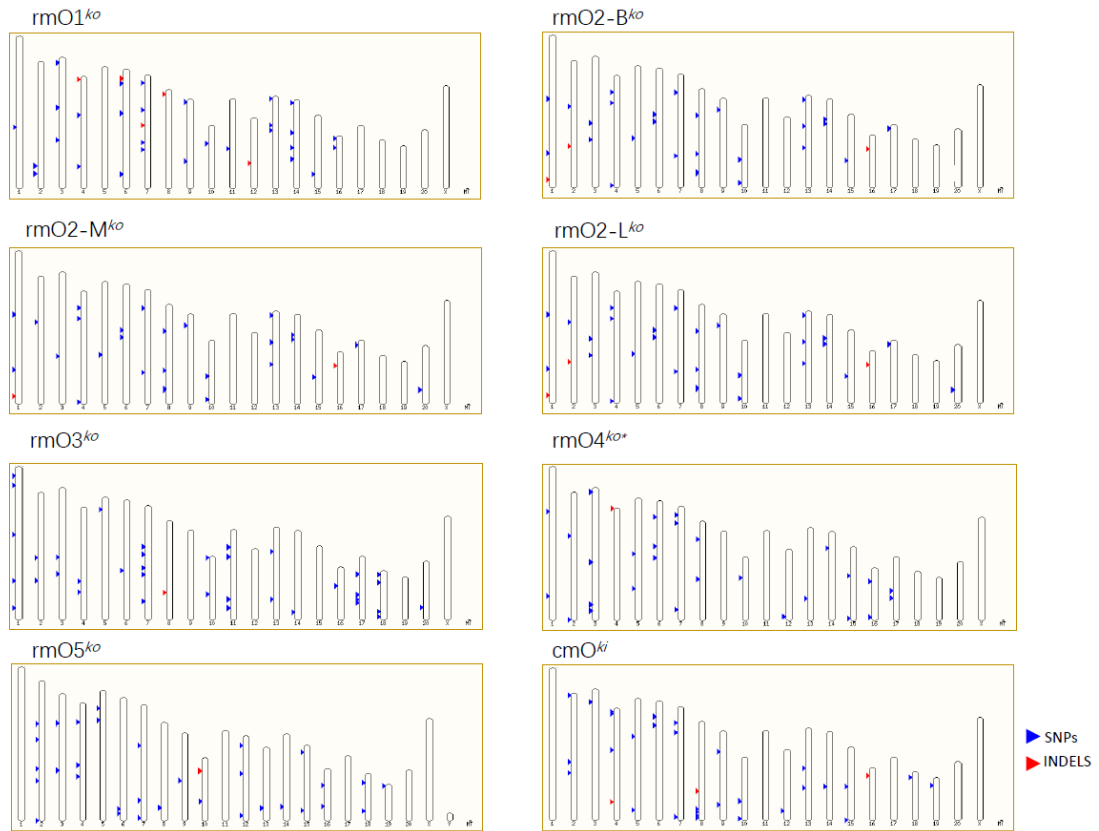

**Supplementary Fig. 7 | Venn diagram of the overlapping DNMs called using four different tools.**

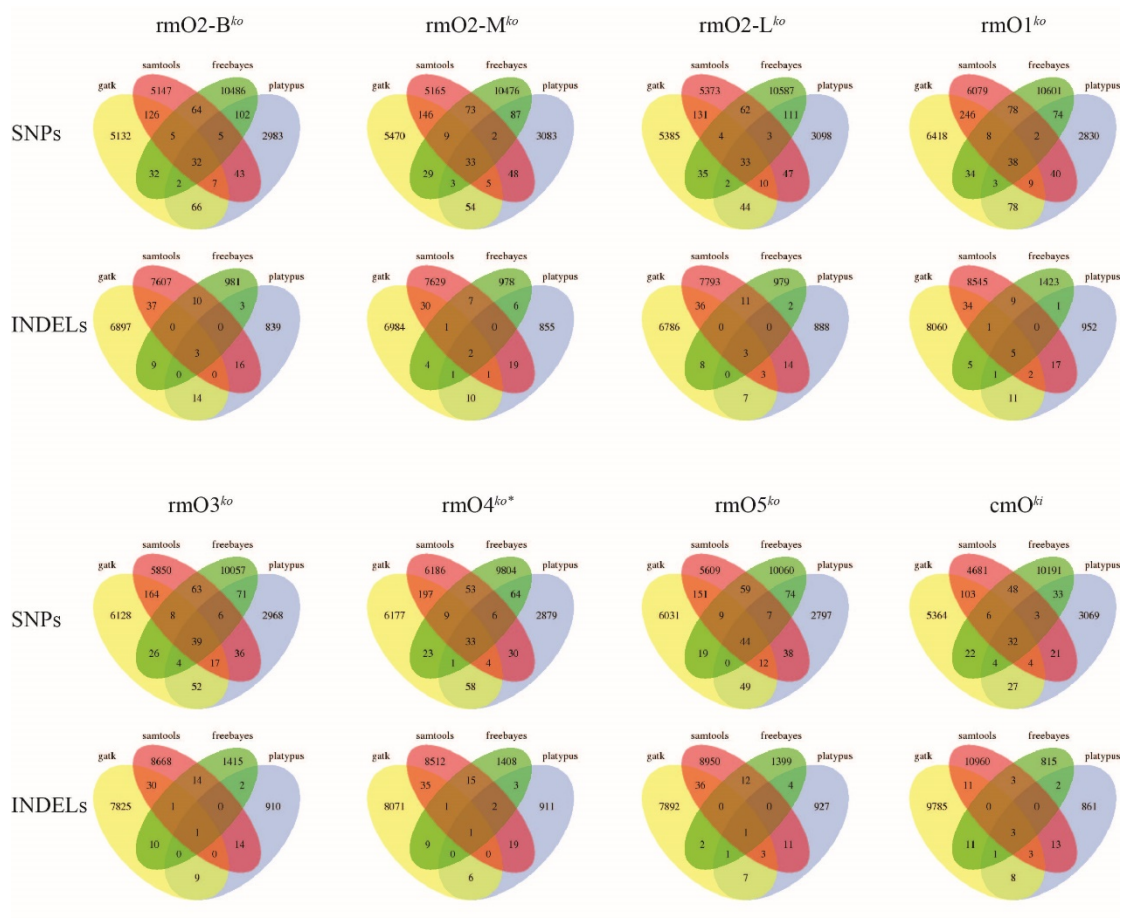

**Supplementary Fig. 8 | Sanger validation results of *rmO1<sup>ko</sup>* DNMs.** F: father, M: mother, O: offspring. The red dashed box indicated SNPs and the red dotted line indicates indels.

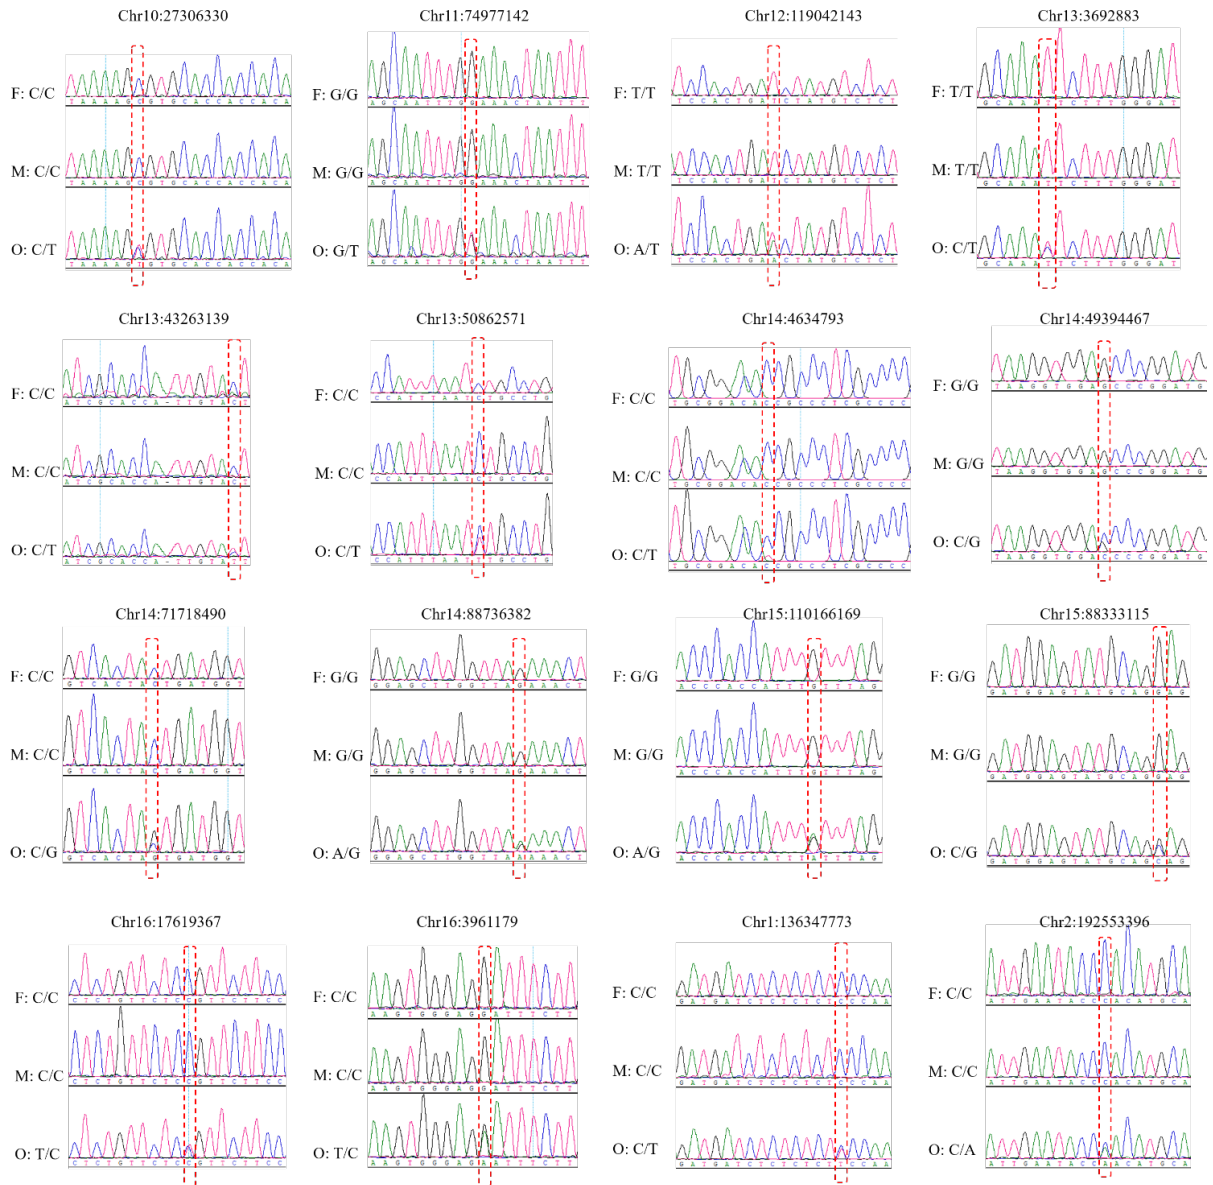

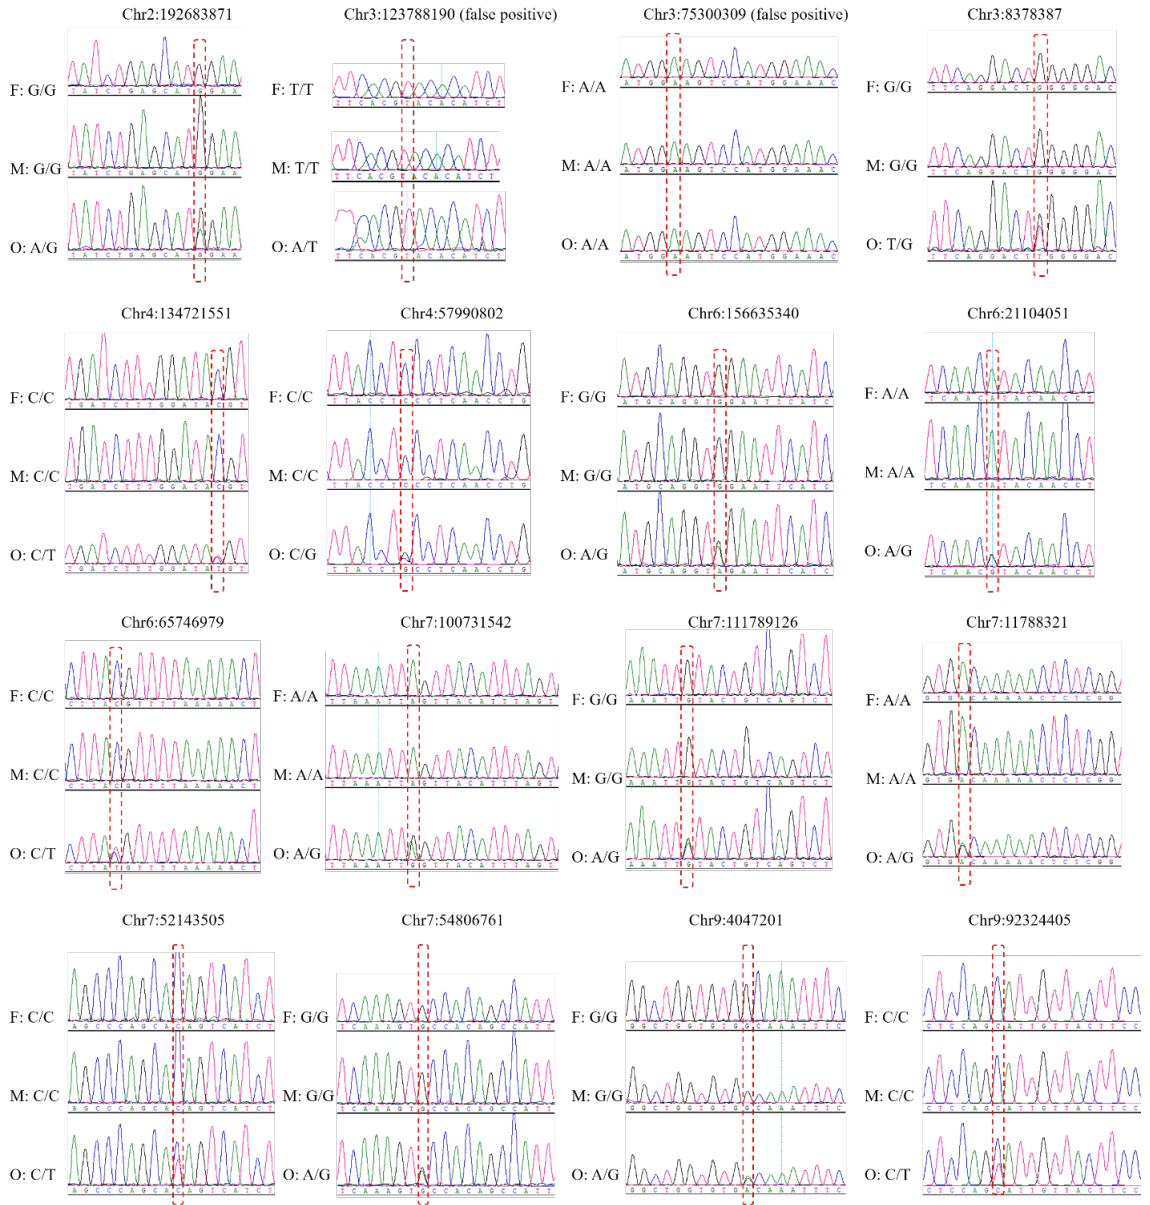



**Supplementary Table 1 | Sample information.**

| <b>Father</b>     | <b>Mother</b>      | <b>Offspring</b>    | <b>Sex</b> | <b>Date of Birth</b> | <b>Gestational day</b> | <b>Method of delivery</b> | <b>Genotyping</b>           | <b>Status</b> |
|-------------------|--------------------|---------------------|------------|----------------------|------------------------|---------------------------|-----------------------------|---------------|
| rmF <sup>wt</sup> | rmM1 <sup>wt</sup> | rmO1 <sup>ko</sup>  | female     | 2015-05-28           | 138                    | premature                 | <i>MCPHI</i> <sup>-/+</sup> | live          |
|                   |                    | rmO2 <sup>ko</sup>  | male       | 2015-05-28           | 138                    | premature                 | <i>MCPHI</i> <sup>-/-</sup> | dead          |
|                   | rmM2 <sup>wt</sup> | rmO3 <sup>ko</sup>  | male       | 2015-06-24           | 160                    | C-section                 | <i>MCPHI</i> <sup>-/+</sup> | live          |
|                   |                    | rmO4 <sup>ko*</sup> | female     | 2015-06-24           | 160                    | C-section                 | <i>MCPHI</i> <sup>+/+</sup> | live          |
|                   |                    | rmO5 <sup>ko</sup>  | female     | 2015-06-24           | 160                    | C-section                 | <i>MCPHI</i> <sup>-/+</sup> | live          |

**Supplementary Table 2 | Quality control of whole genome sequencing data.**

| Cluster    | ID                   | Reads(R1) | Reads(R2) | Q30percent (R1) | Q30percent (R2) | meanQ30 percentage | Raw Depth | eDP mean | Duplication (%) | Mapped rate (%) | Properly Paired(%) | IS mean |
|------------|----------------------|-----------|-----------|-----------------|-----------------|--------------------|-----------|----------|-----------------|-----------------|--------------------|---------|
| 10cas9     | rmF <sup>wt</sup>    | 437754192 | 437754192 | 91.4            | 80.96           | 86.18              | 45.81     | 40.1     | 12.82           | 0.99            | 96.15              | 403.42  |
| 10cas9     | rmM1 <sup>wt</sup>   | 441379369 | 441379369 | 91.86           | 82.26           | 87.06              | 46.23     | 40.57    | 12.62           | 0.99            | 96.19              | 413.4   |
| 10cas9     | rmM2 <sup>wt</sup>   | 444856449 | 444856449 | 92.13           | 82.04           | 87.08              | 45.23     | 41.01    | 12.37           | 0.99            | 96.24              | 413.56  |
| 10cas9     | rmO1 <sup>ko</sup>   | 460430614 | 460430614 | 93.97           | 86.93           | 90.45              | 48.39     | 41.9     | 13.74           | 0.99            | 96.22              | 408.92  |
| 10cas9     | rmO2-B <sup>ko</sup> | 438596862 | 438596862 | 91.81           | 79.77           | 85.79              | 45.98     | 41.5     | 10.93           | 0.99            | 96.33              | 418.2   |
| 10cas9     | rmO2-M <sup>ko</sup> | 427690705 | 427690705 | 91.28           | 80.44           | 85.86              | 44.85     | 40.53    | 9.83            | 0.99            | 96.36              | 418.51  |
| 10cas9     | rmO2-L <sup>ko</sup> | 432868473 | 432868473 | 91.58           | 80.27           | 85.93              | 45.35     | 40.31    | 11.42           | 0.99            | 96.1               | 417.96  |
| 10cas9     | rmO3 <sup>ko</sup>   | 445885275 | 445885275 | 93.49           | 85.75           | 89.62              | 46.84     | 41.39    | 11.96           | 0.99            | 96.24              | 406.18  |
| 10cas9     | rmO4 <sup>ko*</sup>  | 451706794 | 451706794 | 93.73           | 85.85           | 89.79              | 45.92     | 41.68    | 12.49           | 0.99            | 96.24              | 413.87  |
| 10cas9     | rmO5 <sup>ko</sup>   | 453838377 | 453838377 | 93.71           | 84.61           | 89.16              | 47.6      | 41.96    | 12.17           | 0.99            | 96.14              | 417.99  |
| rm-average |                      | 443500711 | 443500711 | 92.5            | 82.89           | 87.69              | 46.22     | 41.1     | 12.04           | 0.99            | 96.22              | 413.2   |
| 3fas       | cmF <sup>wt</sup>    | 613554604 | 613554604 | 95.47           | 89.88           | 92.67              | 64.08     | 55.38    | 15.82           | 1               | 96.09              | 398.42  |
| 3fas       | cmM <sup>wt</sup>    | 718249285 | 718249285 | 95.26           | 89.15           | 92.2               | 76.11     | 64.56    | 15.31           | 0.99            | 96.04              | 397.13  |
| 3fas       | cmO <sup>ki</sup>    | 606545633 | 606545633 | 95.47           | 89.74           | 92.61              | 68.42     | 55.56    | 14.67           | 1               | 96.19              | 396.88  |
| cm-average |                      | 646116507 | 646116507 | 95.4            | 89.59           | 92.5               | 69.54     | 58.5     | 15.27           | 0.99            | 96.11              | 397.48  |

Note: eDP: effective read depth; IS: insert size



**Supplementary Table 3 | Statistics of variants overlapping rate between different tools.**

| Type                                   |                                  | SNPs                                                                |                                                                     |                                                                     |                                                                   |                                                                   |                                                                    |                                                                   | INDELs                                                           |                                                                     |                                                                     |                                                                     |                                                                   |                                                                   |                                                                    |                                                                   |                                                                  |
|----------------------------------------|----------------------------------|---------------------------------------------------------------------|---------------------------------------------------------------------|---------------------------------------------------------------------|-------------------------------------------------------------------|-------------------------------------------------------------------|--------------------------------------------------------------------|-------------------------------------------------------------------|------------------------------------------------------------------|---------------------------------------------------------------------|---------------------------------------------------------------------|---------------------------------------------------------------------|-------------------------------------------------------------------|-------------------------------------------------------------------|--------------------------------------------------------------------|-------------------------------------------------------------------|------------------------------------------------------------------|
| Trio                                   |                                  | rmF <sup>wf</sup> ,<br>rmM1 <sup>wf</sup> ,<br>rmO2-B <sup>ko</sup> | rmF <sup>wf</sup> ,<br>rmM1 <sup>wf</sup> ,<br>rmO2-M <sup>ko</sup> | rmF <sup>wf</sup> ,<br>rmM1 <sup>wf</sup> ,<br>rmO2-L <sup>ko</sup> | rmF <sup>wf</sup> ,<br>rmM1 <sup>wf</sup> ,<br>rmO1 <sup>ko</sup> | rmF <sup>wf</sup> ,<br>rmM1 <sup>wf</sup> ,<br>rmO3 <sup>ko</sup> | rmF <sup>wf</sup> ,<br>rmM1 <sup>wf</sup> ,<br>rmO4 <sup>ko*</sup> | rmF <sup>wf</sup> ,<br>rmM1 <sup>wf</sup> ,<br>rmO5 <sup>ko</sup> | cmF <sup>wf</sup> ,<br>cmM1 <sup>wf</sup> ,<br>cmO <sup>ki</sup> | rmF <sup>wf</sup> ,<br>rmM1 <sup>wf</sup> ,<br>rmO2-B <sup>ko</sup> | rmF <sup>wf</sup> ,<br>rmM1 <sup>wf</sup> ,<br>rmO2-M <sup>ko</sup> | rmF <sup>wf</sup> ,<br>rmM1 <sup>wf</sup> ,<br>rmO2-L <sup>ko</sup> | rmF <sup>wf</sup> ,<br>rmM1 <sup>wf</sup> ,<br>rmO1 <sup>ko</sup> | rmF <sup>wf</sup> ,<br>rmM1 <sup>wf</sup> ,<br>rmO3 <sup>ko</sup> | rmF <sup>wf</sup> ,<br>rmM1 <sup>wf</sup> ,<br>rmO4 <sup>ko*</sup> | rmF <sup>wf</sup> ,<br>rmM1 <sup>wf</sup> ,<br>rmO5 <sup>ko</sup> | cmF <sup>wf</sup> ,<br>cmM1 <sup>wf</sup> ,<br>cmO <sup>ki</sup> |
| Freebayes                              |                                  | 14764912                                                            | 14749570                                                            | 14736766                                                            | 14252445                                                          | 14543314                                                          | 14387107                                                           | 14552891                                                          | 17616002                                                         | 2387828                                                             | 2383757                                                             | 2384310                                                             | 2396452                                                           | 2381389                                                           | 2349867                                                            | 2379194                                                           | 2543011                                                          |
| GATK                                   |                                  | 18018008                                                            | 17557248                                                            | 16756111                                                            | 18032040                                                          | 17902620                                                          | 17903588                                                           | 17900994                                                          | 20886574                                                         | 4357146                                                             | 4354284                                                             | 4355881                                                             | 4374952                                                           | 4351204                                                           | 4352004                                                            | 4350673                                                           | 3903592                                                          |
| Samtools                               |                                  | 14493928                                                            | 14488592                                                            | 14487188                                                            | 14472446                                                          | 14305092                                                          | 13296260                                                           | 14301298                                                          | 17046056                                                         | 4106000                                                             | 4088103                                                             | 4082281                                                             | 4023035                                                           | 4044644                                                           | 4037729                                                            | 4050129                                                           | 4675619                                                          |
| Platypus                               |                                  | 16629543                                                            | 16629435                                                            | 16630154                                                            | 16662612                                                          | 15765770                                                          | 16553433                                                           | 16556609                                                          | 19246854                                                         | 2195249                                                             | 2193336                                                             | 2193079                                                             | 2236743                                                           | 2218780                                                           | 2223224                                                            | 2223854                                                           | 2100526                                                          |
| Variants<br>intersection               | Freebayes:GATK                   | 13721038                                                            | 13351797                                                            | 12731502                                                            | 13278615                                                          | 13546578                                                          | 13416121                                                           | 13559050                                                          | 16564340                                                         | 1399652                                                             | 1396679                                                             | 1396534                                                             | 1404035                                                           | 1394766                                                           | 1380007                                                            | 1395202                                                           | 1527891                                                          |
|                                        | Freebayes:Samtools               | 13454580                                                            | 13444091                                                            | 13446691                                                            | 13038119                                                          | 13281921                                                          | 12214276                                                           | 13280131                                                          | 15975769                                                         | 1270662                                                             | 1269124                                                             | 1268457                                                             | 1272065                                                           | 1263930                                                           | 1250890                                                            | 1264964                                                           | 1422145                                                          |
|                                        | Freebayes:Platypus               | 13398805                                                            | 13381003                                                            | 13373090                                                            | 12945539                                                          | 12582760                                                          | 13086159                                                           | 13222029                                                          | 15979509                                                         | 1240242                                                             | 1237363                                                             | 1236826                                                             | 1250419                                                           | 1241344                                                           | 1228391                                                            | 1241705                                                           | 1354743                                                          |
|                                        | GATK: Samtools                   | 13368497                                                            | 13012704                                                            | 12417176                                                            | 13378470                                                          | 13223716                                                          | 12298689                                                           | 13224557                                                          | 16047367                                                         | 1662639                                                             | 1661152                                                             | 1661594                                                             | 1670566                                                           | 1662048                                                           | 1663487                                                            | 1664362                                                           | 1743692                                                          |
|                                        | GATK: Platypus                   | 15513505                                                            | 15103492                                                            | 14411226                                                            | 15566418                                                          | 14721570                                                          | 15464302                                                           | 15465080                                                          | 18205000                                                         | 1787313                                                             | 1785047                                                             | 1785333                                                             | 1819084                                                           | 1806280                                                           | 1809208                                                            | 1809155                                                           | 1760124                                                          |
|                                        | Samtools: Platypus               | 13237726                                                            | 13230774                                                            | 13229364                                                            | 13242257                                                          | 12473172                                                          | 12180259                                                           | 13096441                                                          | 15797183                                                         | 1490712                                                             | 1488542                                                             | 1488696                                                             | 1508507                                                           | 1499673                                                           | 1500740                                                            | 1501174                                                           | 1561970                                                          |
|                                        | Freebayes:GATK:<br>Samtools      | 12981622                                                            | 12636105                                                            | 12056932                                                            | 12607967                                                          | 12840368                                                          | 11818725                                                           | 12842144                                                          | 15606509                                                         | 1189273                                                             | 1187555                                                             | 1187142                                                             | 1191771                                                           | 1183481                                                           | 1172218                                                            | 1184816                                                           | 1344031                                                          |
|                                        | Freebayes: GATK:<br>Platypus     | 1301504                                                             | 1266230                                                             | 1207104                                                             | 1259490                                                           | 1223708                                                           | 1273371                                                            | 1286201                                                           | 1567464                                                          | 1182299                                                             | 1179716                                                             | 1179203                                                             | 1192471                                                           | 1183806                                                           | 1172169                                                            | 1184427                                                           | 1303130                                                          |
|                                        | Freebayes:<br>Samtools: Platypus | 12816209                                                            | 12806050                                                            | 12808035                                                            | 12436133                                                          | 12065384                                                          | 11661886                                                           | 12670917                                                          | 15334800                                                         | 1090881                                                             | 1088525                                                             | 1088057                                                             | 1099085                                                           | 1091035                                                           | 1080614                                                            | 1091889                                                           | 1235646                                                          |
| GATK: Samtools:<br>Platypus            | 12790948                         | 12451626                                                            | 11878275                                                            | 12812498                                                            | 12063389                                                          | 11784938                                                          | 12670704                                                           | 15429328                                                          | 1400120                                                          | 1398327                                                             | 1398625                                                             | 1416895                                                             | 1408579                                                           | 1409751                                                           | 1410135                                                            | 1476287                                                           |                                                                  |
| Freebayes: GATK:<br>Samtools: Platypus | 12508536                         | 12176530                                                            | 11615962                                                            | 12157438                                                            | 11791952                                                          | 11403992                                                          | 12386275                                                           | 15099333                                                          | 1062339                                                          | 1060092                                                             | 1059767                                                             | 1070284                                                             | 1062359                                                           | 1052582                                                           | 1063453                                                            | 1205860                                                           |                                                                  |
| Max intersection rate                  |                                  | 0.863                                                               | 0.840                                                               | 0.802                                                               | 0.840                                                             | 0.824                                                             | 0.858                                                              | 0.866                                                             | 0.886                                                            | 0.484                                                               | 0.483                                                               | 0.483                                                               | 0.479                                                             | 0.479                                                             | 0.473                                                              | 0.478                                                             | 0.574                                                            |
| Min intersection rate                  |                                  | 0.694                                                               | 0.694                                                               | 0.693                                                               | 0.674                                                             | 0.659                                                             | 0.637                                                              | 0.692                                                             | 0.723                                                            | 0.244                                                               | 0.243                                                               | 0.243                                                               | 0.245                                                             | 0.244                                                             | 0.242                                                              | 0.244                                                             | 0.309                                                            |

**Supplementary Table 4 | Summary of mutations located in the predicted off-target regions detected by WGS data.**

| sgRNA  | No. of mismatches | SpeedSeq                 |                          | Cas-Offinder             |                          | No. of off-target sites |
|--------|-------------------|--------------------------|--------------------------|--------------------------|--------------------------|-------------------------|
|        |                   | No. of NGG genomic sites | No. of NAG genomic sites | No. of NGG genomic sites | No. of NAG genomic sites |                         |
| sgRNA1 | 0                 | 1                        | 0                        | 1                        | 0                        | 0                       |
|        | 1                 | 2                        | 0                        | 0                        | 0                        | 0                       |
|        | 2                 | 2                        | 1                        | 0                        | 0                        | 0                       |
|        | 3                 | 4                        | 9                        | 4                        | 24                       | 0                       |
|        | 4                 | 51                       | 102                      | 96                       | 323                      | 0                       |
|        | 5                 | 687                      | 1,034                    | 1,010                    | 2,634                    | 0                       |
|        | 6                 | -                        | -                        | 8,574                    | 14,722                   | 0                       |
|        | 7                 | -                        | -                        | 59,847                   | 66,295                   | 0                       |
| sgRNA2 | 0                 | 0                        | 0                        | 0                        | 0                        | 0                       |
|        | 1                 | 1                        | 0                        | 1                        | 0                        | 0                       |
|        | 2                 | 3                        | 0                        | 1                        | 0                        | 0                       |
|        | 3                 | 14                       | 11                       | 17                       | 17                       | 0                       |
|        | 4                 | 129                      | 149                      | 205                      | 231                      | 0                       |
|        | 5                 | 1,179                    | 1,428                    | 1,526                    | 1,874                    | 0                       |
|        | 6                 | -                        | -                        | 10,612                   | 13,633                   | 0                       |
|        | 7                 | -                        | -                        | 58,734                   | 77,563                   | 0                       |

**Supplementary Table 5 | Oligonucleotides for generating sgRNA expression vectors.**

| <b>Oligo</b>                  | <b>Sequence (5' to 3')</b> |
|-------------------------------|----------------------------|
| <i>MCPHI</i> sgRNA1 T7 Top    | TAGGGGATGACCACACTTCAACAT   |
| <i>MCPHI</i> sgRNA1 T7 Bottom | AAACATGTTGAAGTGTGGTCATCC   |
| <i>MCPHI</i> sgRNA2 T7 Top    | TAGGTTACACAGATGCAGGACAGC   |
| <i>MCPHI</i> sgRNA2 T7 Bottom | AAACGCTGTCCTGCATCTGTGTA    |

**Supplementary Table 6 | Primers for genotyping.**

| <b>Primer</b>            | <b>Sequence (5' to 3')</b> |
|--------------------------|----------------------------|
| <i>MCPHI</i> exon2 PCR-F | CTGGTCTCAAATCCCTGACTTCGTG  |
| <i>MCPHI</i> exon2 PCR-R | TCTCCCACCACTTACCCATTGCTTT  |
| <i>MCPHI</i> exon4 PCR-F | TTGGGAAGTTTGATTTATACTGAC   |
| <i>MCPHI</i> exon4 PCR-R | GAAGAAGTCATAGGATAAAATAATC  |

**Supplementary Table 7 | Commands used for variant calling.**

| Algorithm               | Version            | Command line                                                                                                     |
|-------------------------|--------------------|------------------------------------------------------------------------------------------------------------------|
| BWA-MEM                 | 0.7.12-r1039       | bwa mem ref.fa read1.fq read2.fq                                                                                 |
| GATK<br>HaplotypeCaller | 3.6                | java -jar GenomeAnalysisTK.jar -T HaplotypeCaller -R ref.fa -I dedup.bam --emitRefConfidence GVCF -o output.gvcf |
| Platypus                | 0.8.1              | Platypus callVariants --bamFiles=dedup.bam --refFile=ref.fa --maxVariants=20 --maxReads=30000000                 |
| Samtools                | 1.3.1              | Samtools mpileup -go 10macaque.by120.bcf -uf ref.fa dedup.bam                                                    |
| Freebayes               | v1.0.2-15-g357f175 | Freebayes -f ref.fa dedup.bam                                                                                    |
| Delly                   | v0.7.7             | delly call -t sv_type -g ref.fa dedup.bam -o sv_type.bcf; bcftools view sv_type.bcf >sv_type.vcf                 |
| Pindel                  | V0.2.5b9           | pindel -i bam.config.txt -f ref.fa -o sv_type                                                                    |

**Supplementary Table 8 | Commands used for SNP filtering.**

| VCF sets  | SF                                                                                                                                                                                                                                                                                               | GF                                                                                        | UM                                                                                                     |
|-----------|--------------------------------------------------------------------------------------------------------------------------------------------------------------------------------------------------------------------------------------------------------------------------------------------------|-------------------------------------------------------------------------------------------|--------------------------------------------------------------------------------------------------------|
| GATK      | <pre>java -jar GenomeAnalysisTK.jar \ -T VariantFiltration \ -R ref.fa \ -V VariantCalls.SNP.vcf \ --filterExpression "QD &lt; 2.0    FS &gt; 60.0    MQ &lt; 30.0    MQRankSum &lt; -12.5    ReadPosRankSum &lt; -8.0 " \ --filterName "my_snp_filter" \ -o VariantCalls.filtered.SNP.vcf</pre> | <pre>python genotype_filter.py "DP:15- 100" "GQ&gt;30" VariantCalls.filtered.vcf.gz</pre> | <pre>vcftools --gzvcf SNPs.vcf.gz --exclude- bed UM_bedfile --recode --recode- INFO-all --stdout</pre> |
| Platypus  | <pre>vcffilter -f "SbPval &gt;0.001 &amp; HapScore &lt;13 &amp; MQ &gt;30 &amp; QD &gt;2 &amp; NR &gt;0 &amp; NF &gt;0" VariantCalls.SNP.vcf.gz</pre>                                                                                                                                            | <pre>python genotype_filter.py "GQ&gt;30" VariantCalls.filtered.vcf.gz</pre>              | <pre>vcftools --gzvcf SNPs.vcf.gz --exclude- bed UM_bedfile --recode --recode- INFO-all --stdout</pre> |
| Freebayes | <pre>vcffilter -f "QUAL &gt;30 &amp; QUAL / AO &gt;10 &amp; SAF &gt;0 &amp; SAR &gt;0 &amp; RPL &gt;1 &amp; RPR &gt;1 &amp; MQM &gt;30 &amp; MQMR &gt;30" VariantCalls.SNP.vcf.gz</pre>                                                                                                          | <pre>python genotype_filter.py "DP:15- 100" "GQ&gt;30" VariantCalls.filtered.vcf.gz</pre> | <pre>vcftools --gzvcf SNPs.vcf.gz --exclude- bed UM_bedfile --recode --recode- INFO-all --stdout</pre> |
| Samtools  | <pre>vcffilter -f "MQ &gt;30 &amp; RPB &gt;0.001 &amp; MQB &gt;0.001 &amp; BQB &gt;0.001 &amp; MQSB &gt;0.001" VariantCalls.SNP.vcf.gz</pre>                                                                                                                                                     | -                                                                                         | <pre>vcftools --gzvcf SNPs.vcf.gz --exclude- bed UM_bedfile --recode --recode- INFO-all --stdout</pre> |

**Supplementary Table 9 | Commands used for INDEL filtering.**

| VCF sets  | SF                                                                                                                                                                                                                                                                     | GF                                                             | UM                                                                                          |
|-----------|------------------------------------------------------------------------------------------------------------------------------------------------------------------------------------------------------------------------------------------------------------------------|----------------------------------------------------------------|---------------------------------------------------------------------------------------------|
| GATK      | java -jar GenomeAnalysisTK.jar \<br>-T VariantFiltration \<br>-R ref.fa \<br>-V VariantCalls_chr\$i.INDELS.vcf \<br>--filterExpression "QD < 2.0    FS > 200.0    ReadPosRankSum < -20.0" \<br>--filterName "my_indel_filter" \<br>-o VariantCalls.filtered.INDELS.vcf | python genotype_filter.py "GQ>30" VariantCalls.filtered.vcf.gz | vcftools --gzvcf INDELS.vcf.gz --exclude-bed UM_bedfile --recode --recode-INFO-all --stdout |
| Platypus  | vcffilter -f "SbPval >0.001 & HapScore <13 & MQ >30 & QD >2 & NR >0 & NF >0" VariantCalls.INDELS.vcf.gz                                                                                                                                                                | python genotype_filter.py "GQ>30" VariantCalls.filtered.vcf.gz | vcftools --gzvcf INDELS.vcf.gz --exclude-bed UM_bedfile --recode --recode-INFO-all --stdout |
| Freebayes | vcffilter -f "QUAL >30 & QUAL / AO >10 & SAF >0 & SAR >0 & RPL >1 & RPR >1 & MQM >30 & MQMR >30" VariantCalls.INDELS.vcf.                                                                                                                                              | python genotype_filter.py "GQ>30" VariantCalls.filtered.vcf.gz | vcftools --gzvcf INDELS.vcf.gz --exclude-bed UM_bedfile --recode --recode-INFO-all --stdout |
| Samtools  | vcffilter -f "MQ >30 & MQSB >0.001" VariantCalls_chr\$i.INDELS.vcf.gz   bgzip > hardfilter.INDELS.vcf.gz                                                                                                                                                               | -                                                              | vcftools --gzvcf INDELS.vcf.gz --exclude-bed UM_bedfile --recode --recode-INFO-all --stdout |

### Supplementary Table 10 | Commands for universal mask (UM)

---

|                  |                                                                                                                                                                                                                                                                                                                                        |
|------------------|----------------------------------------------------------------------------------------------------------------------------------------------------------------------------------------------------------------------------------------------------------------------------------------------------------------------------------------|
|                  | <pre>splitfa ref.fa 150   gzip &gt; read91.fastq.gz</pre>                                                                                                                                                                                                                                                                              |
| Mappability mask | <pre>bwa aln -t 12 -R 1000000 -O 3 -E 3 ref.fa read91.fastq.gz &gt; read91.aln.sai</pre> <pre>bwa samse ref.fa read91.aln.sai read91.fastq.gz   gzip &gt; read91.aln.sam.gz</pre> <pre>gzip -dc read91.aln.sam.gz   gen_raw_mask.pl &gt; rawMask_91_aln.fa</pre> <pre>gen_mask -l 91 -r 0.5 rawMask_91_aln.fa &gt; mask_91_50.fa</pre> |
| LCR mask         | <pre>mdust ref.fa -w 7 -v 28 -c   gzip &gt; mdust.mask.txt.gz</pre>                                                                                                                                                                                                                                                                    |

---
