# Supplementary material for: Trio deep-sequencing does not reveal unexpected off-target and on-target mutations in Cas9-edited rhesus monkeys
Source: PubMed Central journal article supplement (PMC6892871; doi:10.1038/s41467-019-13481-y), 2019-12-04
Supplement: 41467_2019_13481_MOESM6_ESM.pdf [file 41467_2019_13481_MOESM6_ESM.pdf]

**Title:** Supplementary Data 1

**Description:** Summary of DNMs and LFDMs detected in the Cas9-treated monkeys.

**Title:** Supplementary Data 2

**Description:** Statistics of SNPs and INDELS in each filter step.
